# Supplementary material for: Performance of 22 Rapid Lateral Flow Tests for SARS-CoV-2 Antigen Detection and Influence of “Variants of Concern”: Implications for Clinical Use
Source: PubMed Central journal article supplement (PMC9430704; doi:10.1128/spectrum.01157-22), 2022-07-12
Supplement: spectrum.01157-22-s0001.pdf [file spectrum.01157-22-s0001.pdf]

**Supplementary Table 1.** SARS-CoV-2 antigen LFTs evaluated in the study, with the abbreviations used to designate them in the text, tables and figures. NB: all LFTs assessed with Cohort/Panels 2 and 3 used visual reading. \* NM = not mentioned

|                   |                                        | Test                                          | Manufacturer          | Abbreviation  | Targeted antigen | Volume of transport buffer (µL) | Number of drops applied to the device | Time to read |
|-------------------|----------------------------------------|-----------------------------------------------|-----------------------|---------------|------------------|---------------------------------|---------------------------------------|--------------|
| <b>Comparator</b> |                                        | COVID-VIRO® Antigen Rapid Test                | AAZ                   | AAZ           | N protein        | 100 µL                          | 3 drops                               | 15 min       |
| <b>Panel 1</b>    | Visual reading                         | CerTest SARS-CoV-2 Card Test                  | CerTest Biotec        | CerTest       | N protein        | 100 µL                          | 3 drops                               | 10 min       |
|                   |                                        | GenBody COVID-19 Ag                           | GenBody Inc.          | GenBody       | N protein        | 100 µL                          | 4 drops                               | 20 min       |
|                   |                                        | NADAL COVID-19 Ag test                        | Nal von Minden        | Nadal         | N protein        | 100 µL                          | 2 drops                               | 15 min       |
|                   |                                        | Rapid Test Antigen GENSURE COVID-19           | Gensure               | GenSure       | N protein        | 100 µL                          | 3 drops                               | 15 min       |
|                   |                                        | AMP Rapid Test SARS-CoV-2 Ag                  | AMP Diagnostics       | AMP           | N protein        | 100 µL                          | 4 drops                               | 15 min       |
|                   |                                        | QuickProfile™ COVID-19 Antigen Test           | LumiQuick Diagnostics | Quick Profile | N protein        | 100 µL                          | Strip immersion                       | 10 min       |
|                   |                                        | Novel Coronavirus (COVID-19) Antigen Test Kit | Medakit               | Novel         | N protein        | 100 µL                          | 3 drops                               | 15 min       |
|                   |                                        | Toda Coronadiag Ag                            | Toda Pharma           | Toda Pharma   | N protein        | 100 µL                          | 2 drops                               | 15 min       |
|                   | Automatic reading                      | SOFIA SARS Antigen FIA                        | Quidel                | Sofia         | N protein        | 250 µL                          | 4 drops                               | 30 min       |
|                   |                                        | WANTAI SARS-Cov-2 Ag Rapid test               | Eurobio Scientific    | Wantai        | N protein        | 80 µL                           | 70 µL                                 | 15 min       |
| <b>Panel 2</b>    | SARS-CoV-2 Antigen Rapid Detection Kit | Genomic vision                                | Genomic Vision        | NM*           | 100 µL           | 3 drops                         | 15 min                                |              |

|                |                                                       |                    |              |                        |        |         |        |
|----------------|-------------------------------------------------------|--------------------|--------------|------------------------|--------|---------|--------|
|                | RealityTech Antigen Test COVID 19                     | Fasual Care        | Fasual Care  | NM*                    | 100 µL | 3 drops | 15 min |
|                | COVID-19 ANTIGEN RAPID TEST                           | Servibio           | ServiBio     | NM*                    | 100 µL | 3 drops | 15 min |
|                | HUMASIS ONE STEP COVID 19 AG TEST                     | Eurobio Scientific | Humasis      | N protein<br>S protein | 100 µL | 3 drops | 15 min |
|                | BSD-0500333-25- COVID19 Speed-Antigen Test            | Biospeedia         | BioSpeedia   | NM*                    | 100 µL | 2 drops | 20 min |
|                | SARS-CoV-2 Spike Colloidal Gold Chromatographic assay | RBiopharm          | R Biopharm   | S protein              | 100 µL | 2 drops | 15 min |
|                | Test antigénique rapide CLINITEST COVID 19            | Siemens Healthcare | Siemens      | N protein              | 100 µL | 4 drops | 15 min |
|                | NG-Test COVID19                                       | NG-Biotech         | NG Biotech 2 | N protein              | 120 µL | 3 drops | 15 min |
|                | INDICAID COVID-19 RAPID ANTIGEN TEST                  | Medisur            | Medisur      | N protein              | 100 µL | 3 drops | 20 min |
| <b>Panel 3</b> | PCL TEST COVID AG                                     | Tanit Care         | Tanit Care   | N protein              | 100 µL | 5 drops | 10 min |
|                | BIOSENSOR Standard F COVID-19 Ag FIA                  | Orgentec           | Orgentec     | N protein              | 350 µL | 4 drops | 30 min |

**Supplementary Figure 1.** Ct distribution in the 3 SARS-CoV-2 RNA-positive panels described in **Table 1**. NB: The Sofia and Wantai tests were studied on subsets of the original panel, including 133 and 118 samples, respectively, collected on a transparent VTM.

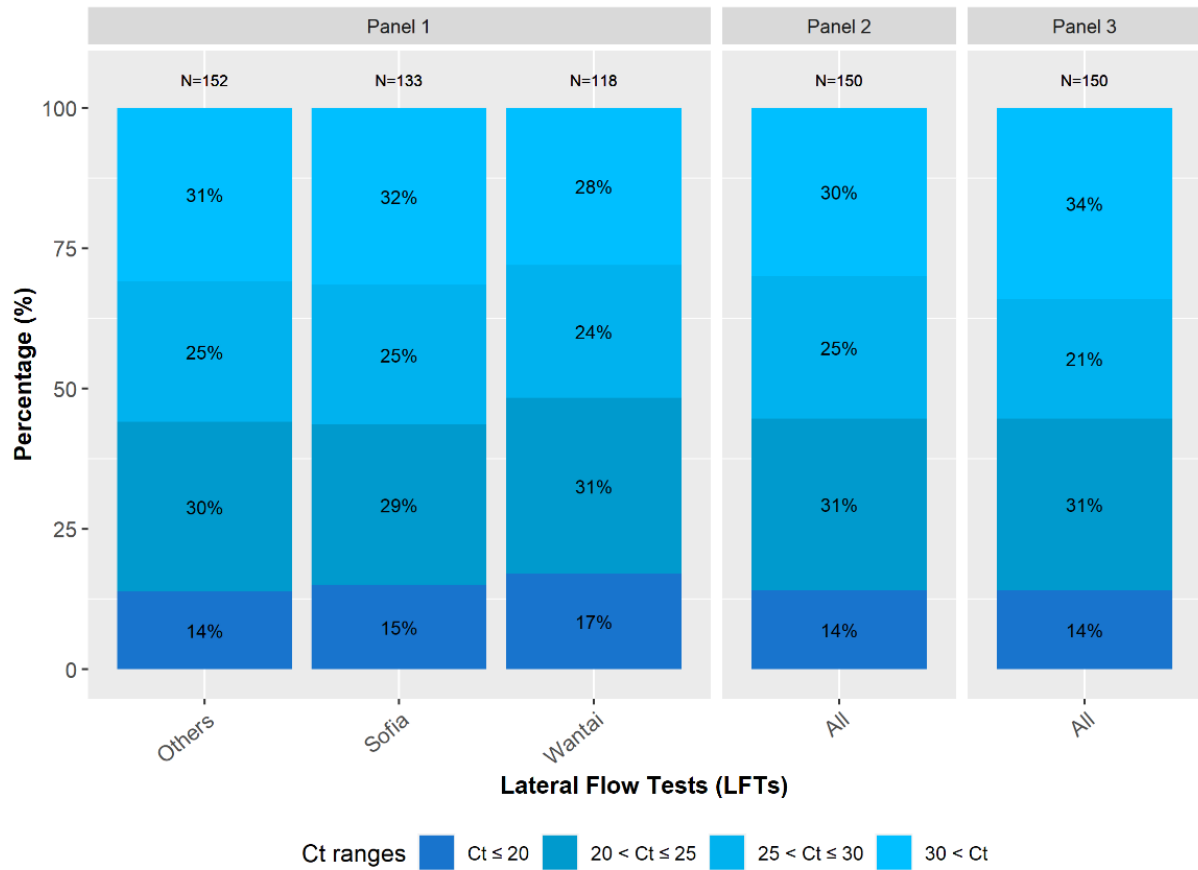

**Supplementary Table 2.** Rates of success of the different RDTs and invalid results in SARS-CoV-2 RNA-positive and negative samples. Non-presented RDT get a 100% rate of success.

|                | Tests                | Rate of success (%) | Number (%) of invalid results |                         |
|----------------|----------------------|---------------------|-------------------------------|-------------------------|
|                |                      |                     | SARS-CoV-2 RNA-positive       | SARS-CoV-2 RNA-negative |
| <b>Panel 1</b> | GenBody <sup>1</sup> | 96.0%               | 8 (5.3%)                      | 4 (2.7%)                |
|                | Nadal                | 98.7%               | -                             | 4 (2.7%)                |
|                | GenSure              | 99.3%               | 2 (1.3%)                      | -                       |
|                | AMP                  | 99.3%               | 1 (0.7%)                      | 1 (0.7%)                |
|                | Quick Profile        | 99.7%               | 1 (0.7%)                      | -                       |
|                | Novel <sup>1</sup>   | 99.0%               | 2 (1.3%)                      | 1 (0.7%)                |
|                | Toda Pharma          | 99.3%               | 2 (1.4%)                      | -                       |
|                | Sofia                | 99.3%               | 1 (0.7%)                      | -                       |
| <b>Panel 2</b> | Fasual Care          | 99.3%               | 1 (0.7%)                      | 1 (0.8%)                |
|                | Humasis              | 99.6%               | -                             | 1 (0.8%)                |
|                | R Biopharm           | 99.3%               | 1 (0.7%)                      | -                       |
| <b>Panel 3</b> | Orgentec             | 99.7%               | 1 (0.7%)                      | -                       |
|                |                      |                     | <b>Total: N=20</b>            | <b>Total: N=12</b>      |

<sup>1</sup> one invalid result from the same sample

**Supplementary Table 3.** Other respiratory viruses found in SARS-CoV-2 RNA-negative samples used for specificity evaluations containing at least one respiratory virus.

| <b>Respiratory Viruses</b>  | <b>Panel 1 (n=76)</b> | <b>Panel 2 (n=25)</b> | <b>Panel 3 (n=26)</b> |
|-----------------------------|-----------------------|-----------------------|-----------------------|
| Adenovirus                  | 6                     | 1                     | 1                     |
| Metapneumovirus             | 7                     | 2                     | 2                     |
| Rhinovirus/Enterovirus      | 7                     | 3                     | 3                     |
| Respiratory syncytial virus | 7                     | 2                     | 2                     |
| Influenza A virus           | 24                    | 2                     | 3                     |
| Influenza B virus           | 5                     | 1                     | 1                     |
| Parainfluenza virus 1       | 2                     | -                     | -                     |
| Parainfluenza virus 2       | 2                     | -                     | -                     |
| Parainfluenza virus 3       | 2                     | 3                     | 3                     |
| Parainfluenza virus 4       | 2                     | 3                     | 3                     |
| Coronavirus 229E            | 3                     | 2                     | 2                     |
| Coronavirus HKU1            | 3                     | 2                     | 2                     |
| Coronavirus NL63            | 3                     | 2                     | 2                     |
| Coronavirus OC43            | 3                     | 2                     | 2                     |
